# Supplementary material
Source: PubMed Central journal article supplement (PMC5436587)
Supplement: ac7b00379_si_001.pdf [file ac7b00379_si_001.pdf]

## Supporting Information

### Characterization of Complete Histone Tail Proteoforms Using Differential Ion Mobility Spectrometry

Pavel V. Shliaha,<sup>1</sup> Matthew A. Baird,<sup>2</sup> Mogens M. Nielsen,<sup>1</sup> Vladimir Gorshkov,<sup>1</sup> Andrew P. Bowman,<sup>2</sup> Julia L. Kaszycki,<sup>2</sup> Ole N. Jensen,<sup>1\*#</sup> Alexandre A. Shvartsburg<sup>2#</sup>

1. Department of Biochemistry and Molecular Biology, VILLUM Center for Bioanalytical Sciences, and Center for Epigenetics, University of Southern Denmark, DK-5230 Odense M, Denmark

2. Department of Chemistry, Wichita State University, 1845 Fairmount, Wichita, KS 67260, USA

#### Corresponding Author

\* jenseno@bmb.sdu.dk

#### Author Contributions

#The two senior authors of this work.

## EXPERIMENTAL SECTION

### Intavis ResPep Settings

#### Solutions

- Fmoc-aa solution: 650 mM solution in DMF
- Activator: 600 mM HBTU in DMF
- Base: N-Methylmorpholine in DMF 0.81:1 v/v
- Capping solution: 5% acetic anhydride in DMF
- Deprotection solution: 20% Piperidine in DMF

ResPep program. We subjected the amino acids 1 – 8 to double coupling for 10 min, amino acids 9 - 18 to double coupling for 30 min, and amino acids 19 - 26 to triple coupling for 50 min.

#### Cycle: 1 - 8

- 5 Deprotection 120  $\mu$ L, Piperidine -> Peptides
- 6 Deprotection 80  $\mu$ L, Piperidine -> Peptides
- 7 WashColumns 150  $\mu$ L, Reservoir -> Peptides, 3x
- 8 WashColumns 200  $\mu$ L, Reservoir -> Peptides, 3x
- 9 WashColumns 250  $\mu$ L, Reservoir -> Peptides, 2x
- 10 Coupling 46.1 (activator) + 12.5 (base) + 5 (DMF) + 39.4 (derivative) ->  
Peptides – 10 min reaction time
- 11 Coupling 46.1 (activator) + 12.5 (base) + 5 (DMF) + 39.4 (derivative) ->  
Peptides – 10 min reaction time
- 12 Capping 120  $\mu$ L, Capping - reaction time 5 min
- 13 WashColumns 150  $\mu$ L, Reservoir ->Peptides, 3x
- 14 WashColumns 200  $\mu$ L, Reservoir -> Peptides, 2x
- 15 WashColumns 250  $\mu$ L, Reservoir -> Peptides, 2x

#### Cycle: 9 - 18

- 16 Deprotection 120  $\mu$ L, Piperidine -> Peptides
- 17 Deprotection 80  $\mu$ L, Piperidine -> Peptides
- 18 WashColumns 150  $\mu$ L, Reservoir -> Peptides, 3x
- 19 WashColumns 200  $\mu$ L, Reservoir -> Peptides, 3x
- 20 WashColumns 250  $\mu$ L, Reservoir -> Peptides, 2x
- 21 Coupling 46.1 (activator) + 12.5 (base) + 5 (DMF) + 39.4 (derivative) ->

Peptides – 30min reaction time

22 Coupling 46.1 (activator) + 12.5 (base) + 5 (DMF) + 39.4 (derivative)->

Peptides – 30min reaction time

23 Capping 120 µL, Capping -> Peptides - reaction time 5 min

24 WashColumns 150 µL, Reservoir ->Peptides, 3x

25 WashColumns 200 µL, Reservoir -> Peptides, 2x

26 WashColumns 250 µL, Reservoir -> Peptides, 2x

Cycle: 19 - max (-> 25)

27 Deprotection 120 µL, Piperidine -> Peptides

28 Deprotection 120 µL, Piperidine -> Peptides

29 WashColumns 150 µL, Reservoir -> Peptides, 3x

30 WashColumns 200 µL, Reservoir -> Peptides, 3x

31 WashColumns 250 µL, Reservoir -> Peptides, 2x

32 Coupling 51.5 (activator) + 14 (base) + 5 (DMF) + 43.5 (derivative) ->

Peptides – 50min reaction time

33 Coupling 51.5 (activator) + 14 (base) + 5 (DMF) + 43.5 (derivative)->

Peptides – 50min reaction time

34 Coupling 51.5 (activator) + 14 (base) + 5 (DMF) + 43.5 (derivative)->

Peptides – 50min reaction time

35 Capping 120 µL, Capping -> Peptides - reaction time 5 min

36 WashColumns 150 µL, Reservoir -> Peptides, 3x

37 WashColumns 200 µL, Reservoir -> Peptides, 2x

38 WashColumns 250 µL, Reservoir -> Peptides, 2x

Final

39 WashColumns 150 µL, Reservoir -> Peptides

40 WashColumns 200 µL, DCMwash -> Peptides

41 WashColumns 200 µL, Reservoir -> Peptides

42 Deprotection 120 µL, Piperidine -> Peptides

43 Deprotection 100 µL, Piperidine -> Peptides

44 Deprotection 100 µL, Piperidine -> Peptides

45 WashColumns 200 µL, Reservoir -> Peptides, 2x

46 WashColumns 200 µL, Reservoir -> Peptides, 2x

47 WashColumns 250 µL, Reservoir -> Peptides, 2x

48 WashColumns 250  $\mu$ L, Ethanol -> Peptides, 3x

49 WashColumns 250  $\mu$ L, DCMwash -> Peptides

50 RinseNeedle 2500 / 2500  $\mu$ L

### HPLC conditions

The Waters column was used at ambient temperature to purify the Part I and full histone tail employing gradient 1 and the Part II employing gradient 2. Solvents were: buffer A (aqueous) 0.1% TFA in H<sub>2</sub>O; buffer B (organic) 0.1% TFA in 9:1 Acetonitrile/H<sub>2</sub>O. The elution rate was 5 mL/min.

#### Gradient 1

1. Column equilibration 0% B - 6 min
2. Sample loading 1 - 3 min
3. 0 - 7% buffer B in 2 min
4. 7 - 16% buffer B in 15 min
5. 16 - 100% buffer B in 1 min
6. Column wash 0% B - 3 min

#### Gradient 2

7. Column equilibration 0% B - 6 min
8. Sample loading 1 - 3 min
9. 0 - 14% buffer B in 2 min
10. 14 - 23% buffer B in 15 min
11. 23 - 100% buffer B in 1 min
12. Column wash 0% B - 3min

### Statistical Evaluation of the Orthogonality of Separations Across Charge States

To assess the orthogonality of separations across charge states, we found the EC values at maximum signal intensity for trimethylated, acetylated, and phosphorylated variants in each (Table S1) and statistically tested their pairwise linear correlation between every charge state and all others. The analysis has utilized the R stats package, with the `cor.test()` function at default settings using the statistics based on Pearson's product moment correlation coefficient (Table S2). Of the 30 charge state pairs, only two exhibited significant correlations ( $p < 0.05$ ): me3 tails at  $z = 9$  and 12 and p tails at  $z = 8$  and 10. The adjustment for multiple testing (using the Benjamini-Hochbeck method implemented in `p.adjust()` function) has produced the final answer of no significant correlation.

### Results and Discussion

#### Figures

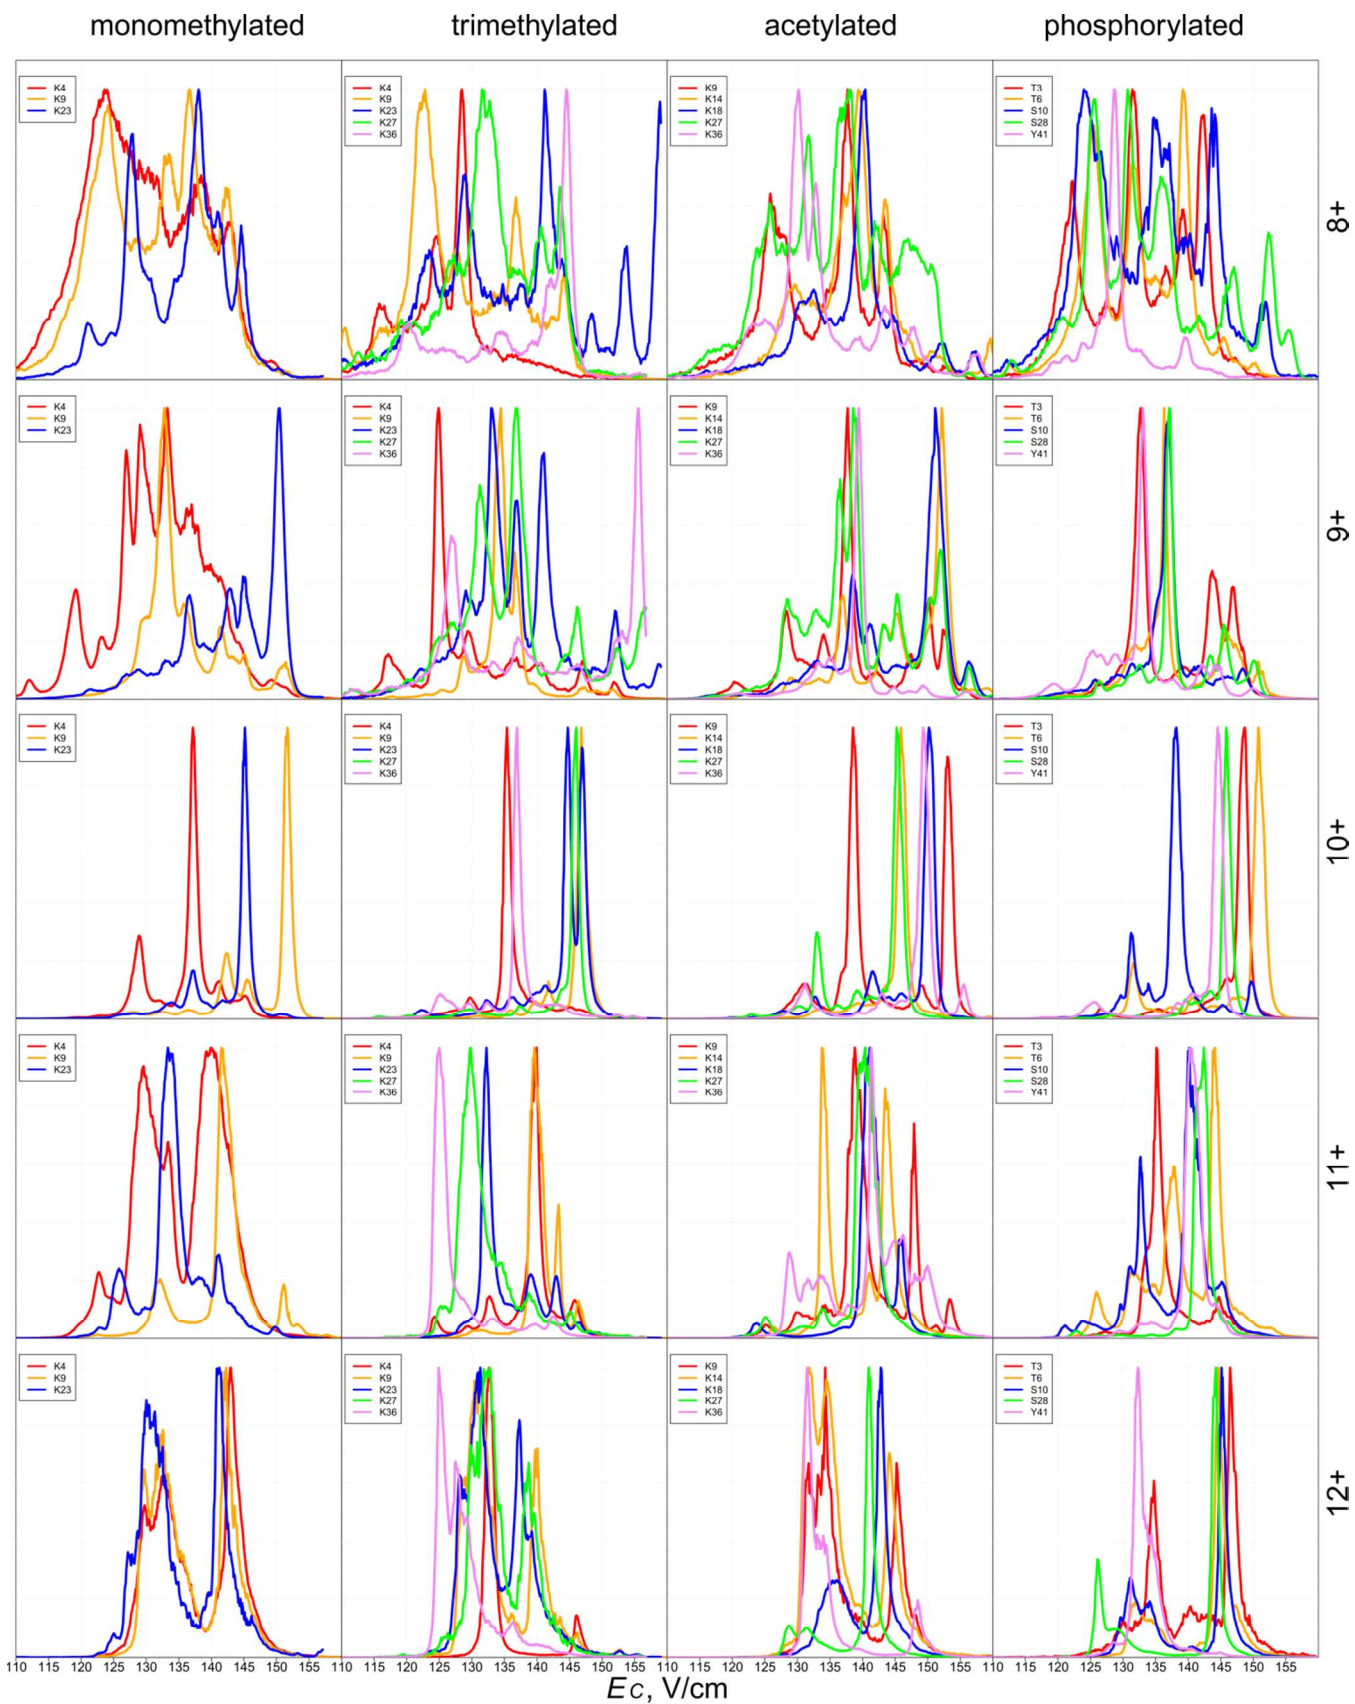

Figure S1. FAIMS spectra for all 18 PTM localization variants of monomethylated (me), trimethylated (me3), acetylated (ac), and phosphorylated (p) histone tail ions in this work (charge states  $z = 8 - 12$ ).

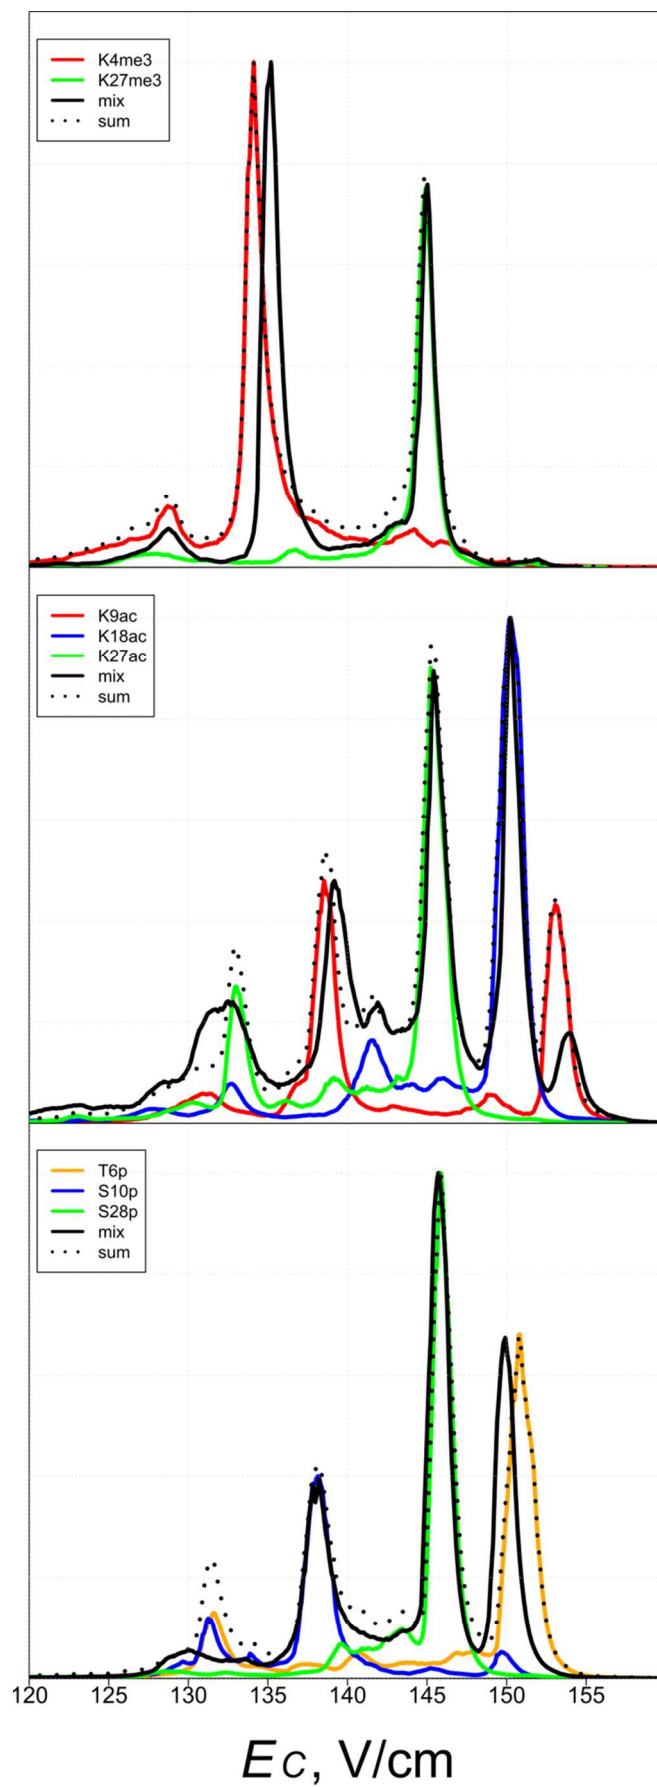

Figure S2. Validation of FAIMS separation by comparison of the spectra measured for individual variants and their computed additions with the spectra for variant mixtures.

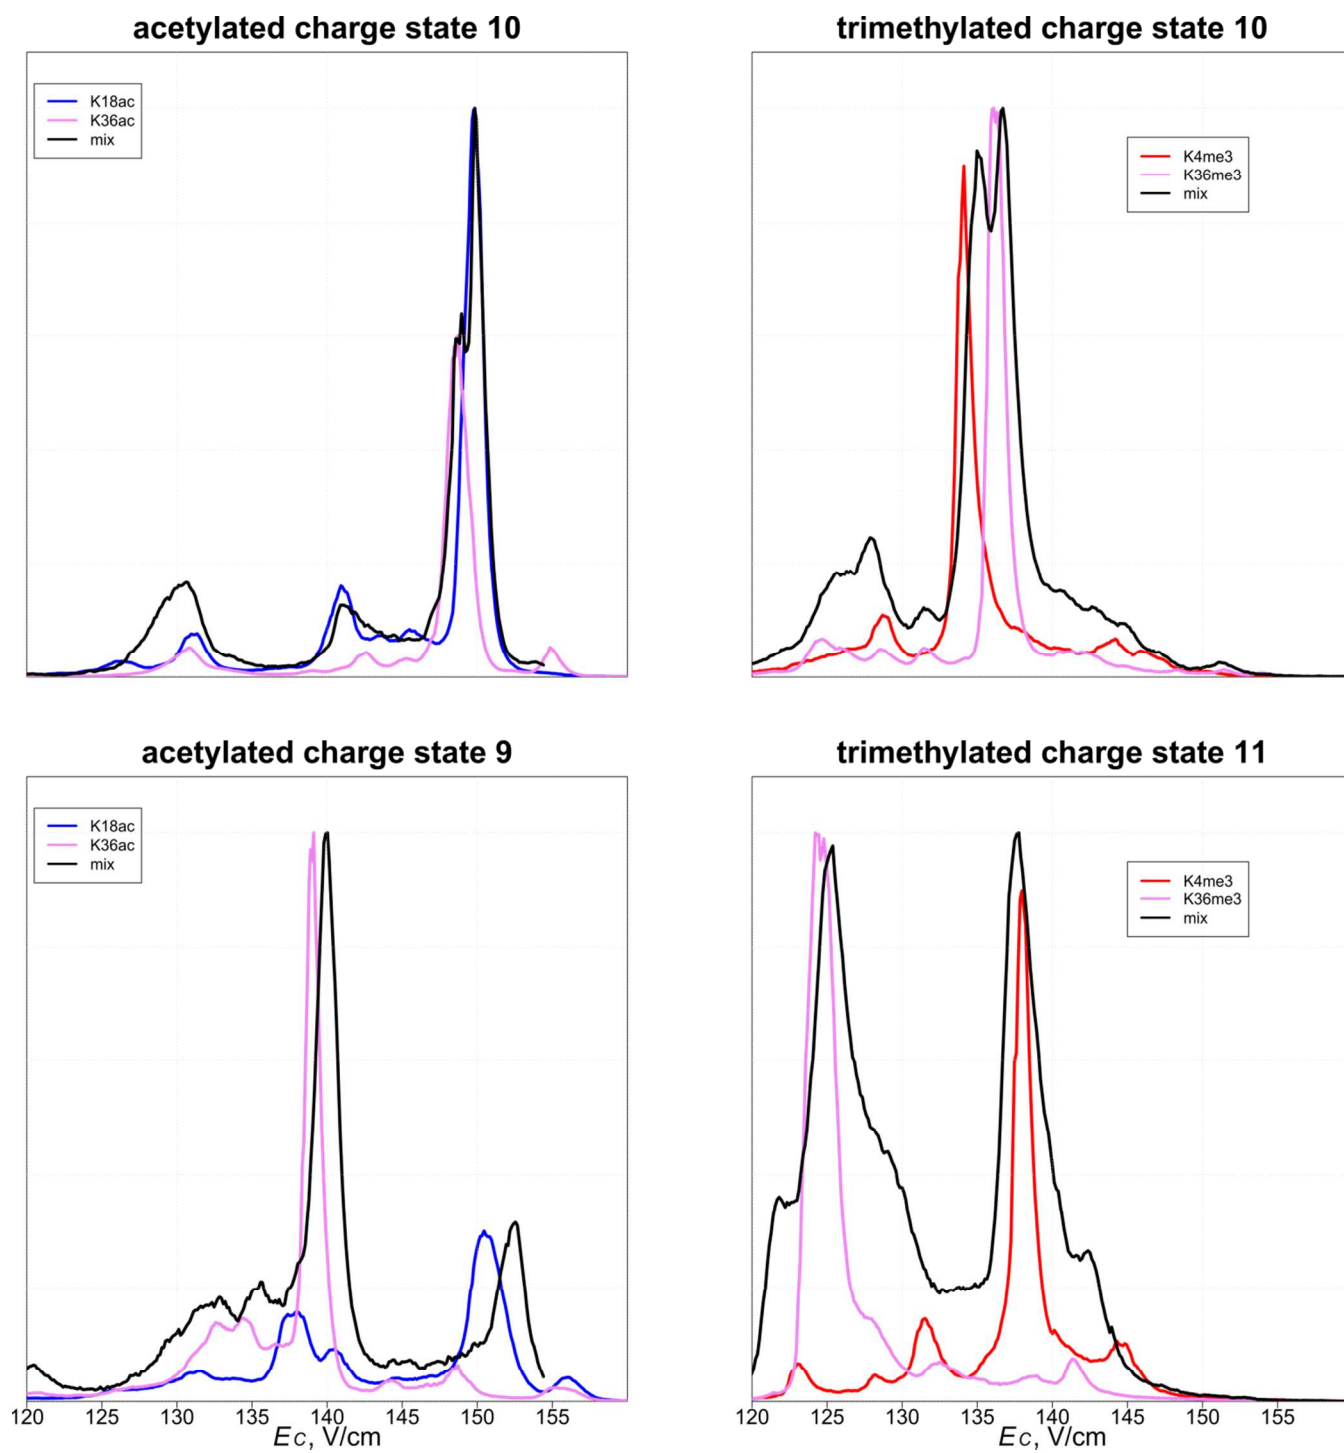

Figure S3. Examples of orthogonal separations at different charge states. The variants not resolved at  $z = 10$  are separated baseline at other charge states.

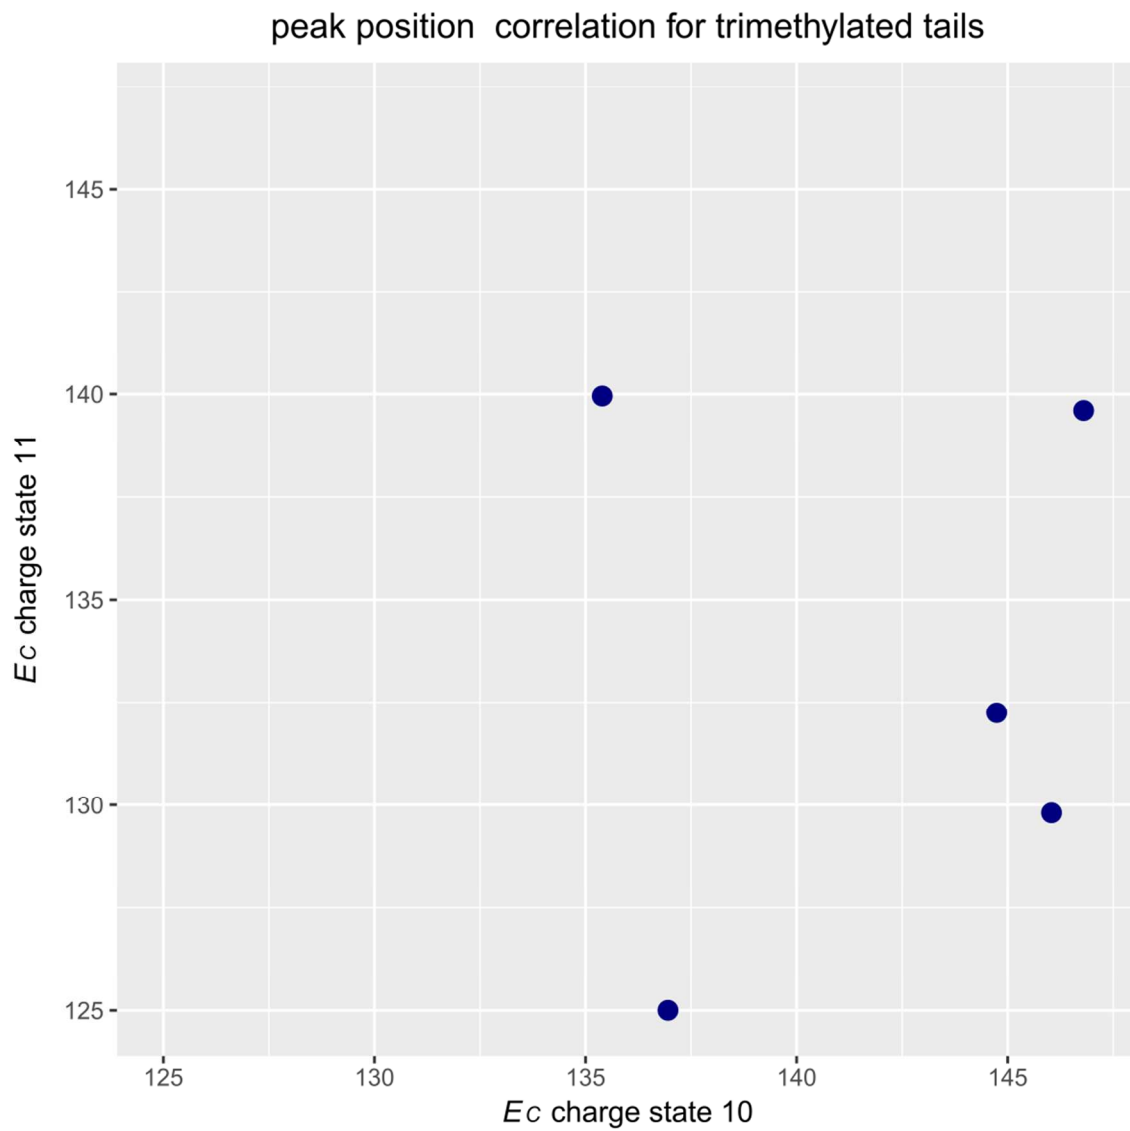

Figure S4A. The FAIMS separations of me3 variants at  $z = 10$  and  $11$  are uncorrelated.



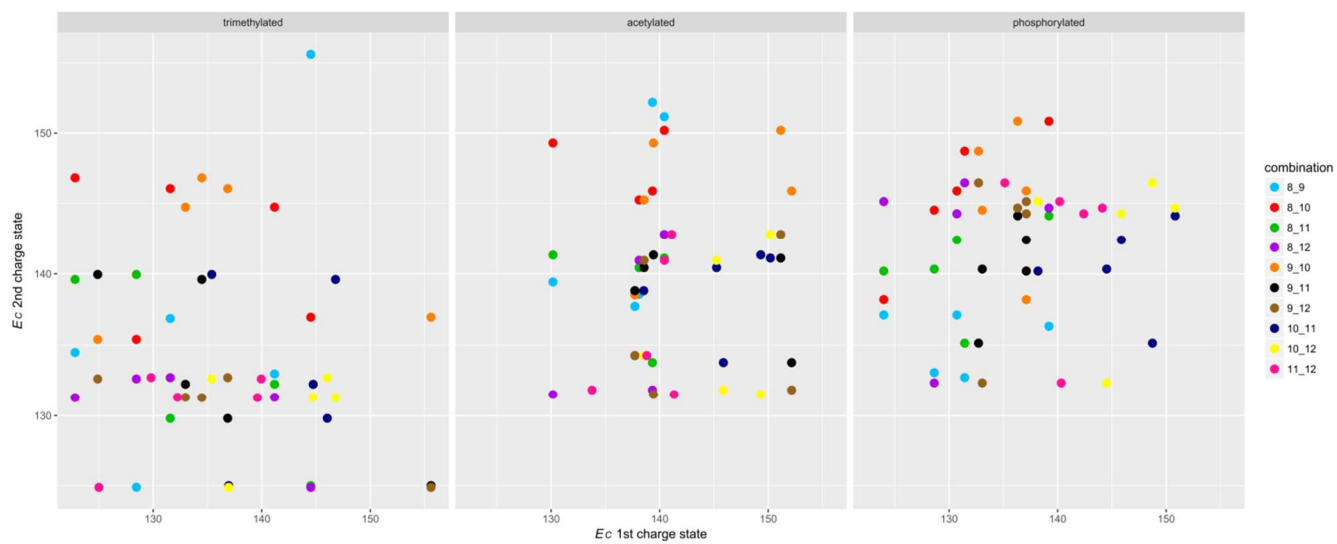

Figure S4B. Overall lack of correlation between FAIMS separations of m3, ac, and p variants across charge states.

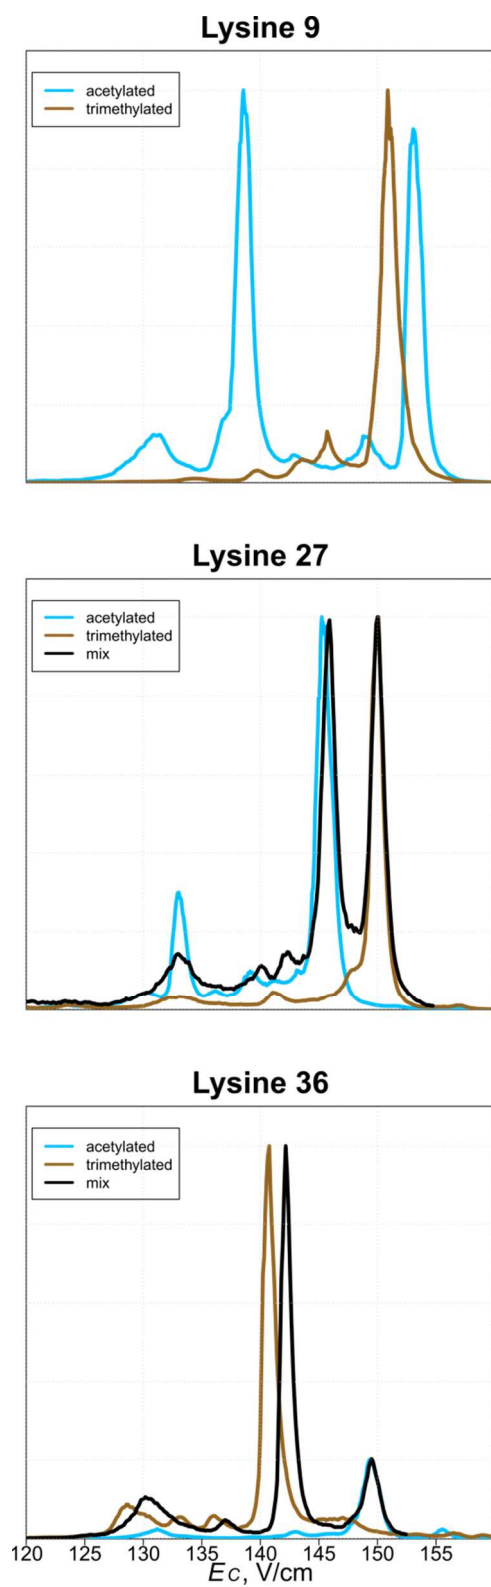

Figure S5. Normalized FAIMS spectra for the tails trimethylated or acetylated at the same K position and their mixtures.

A)

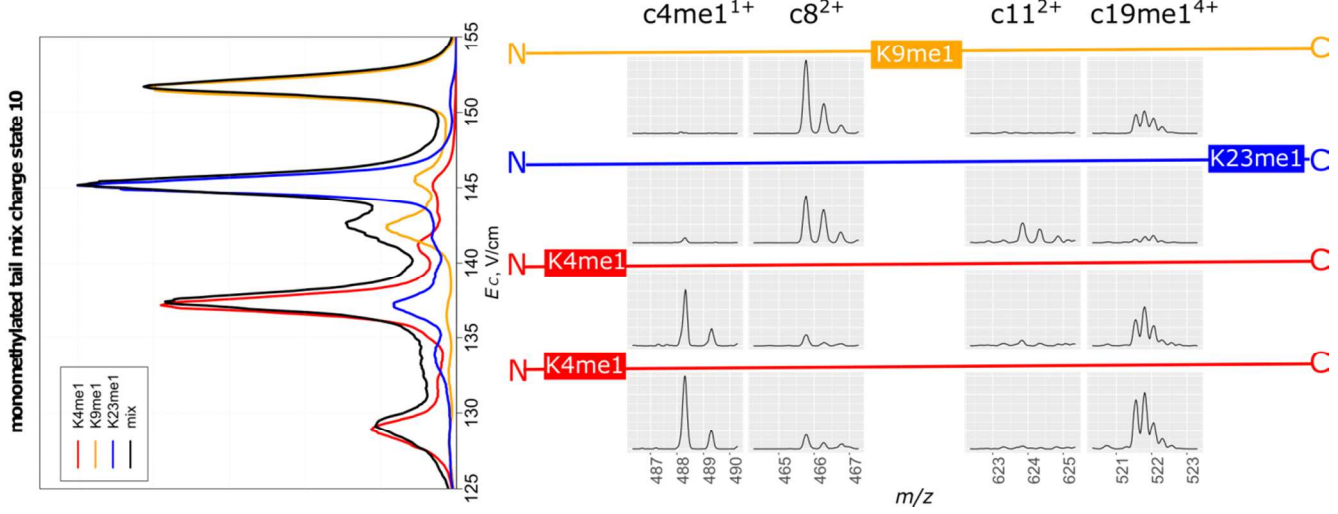

B)

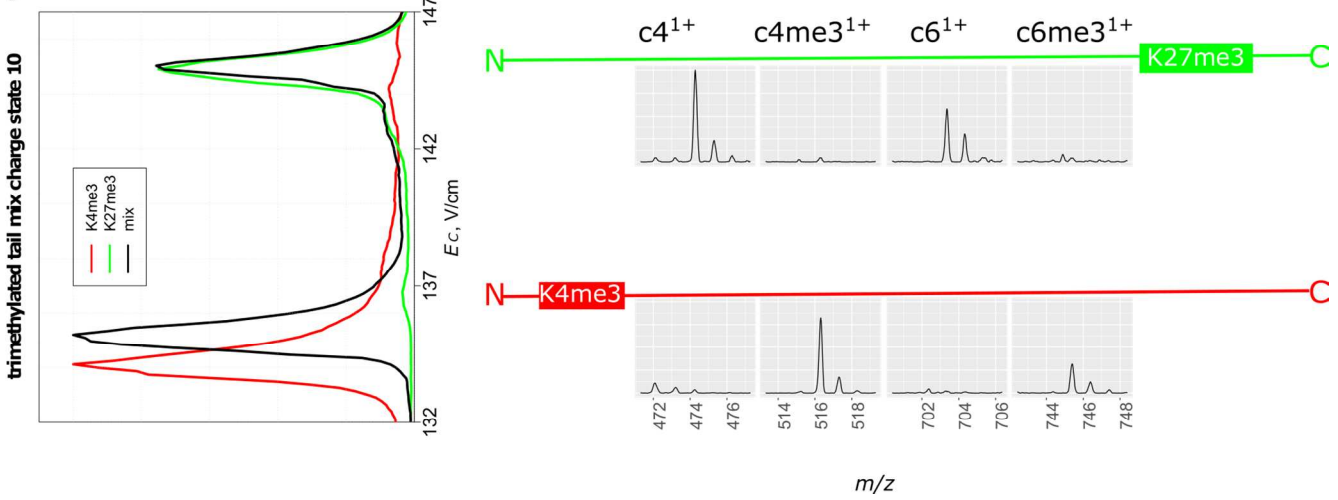

C)

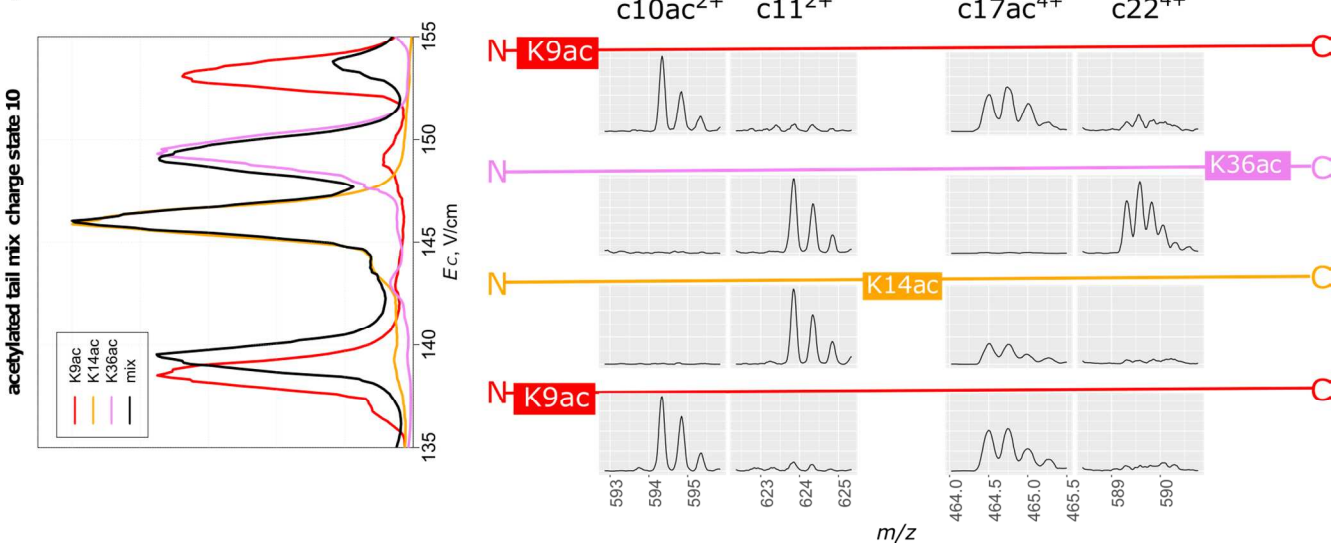

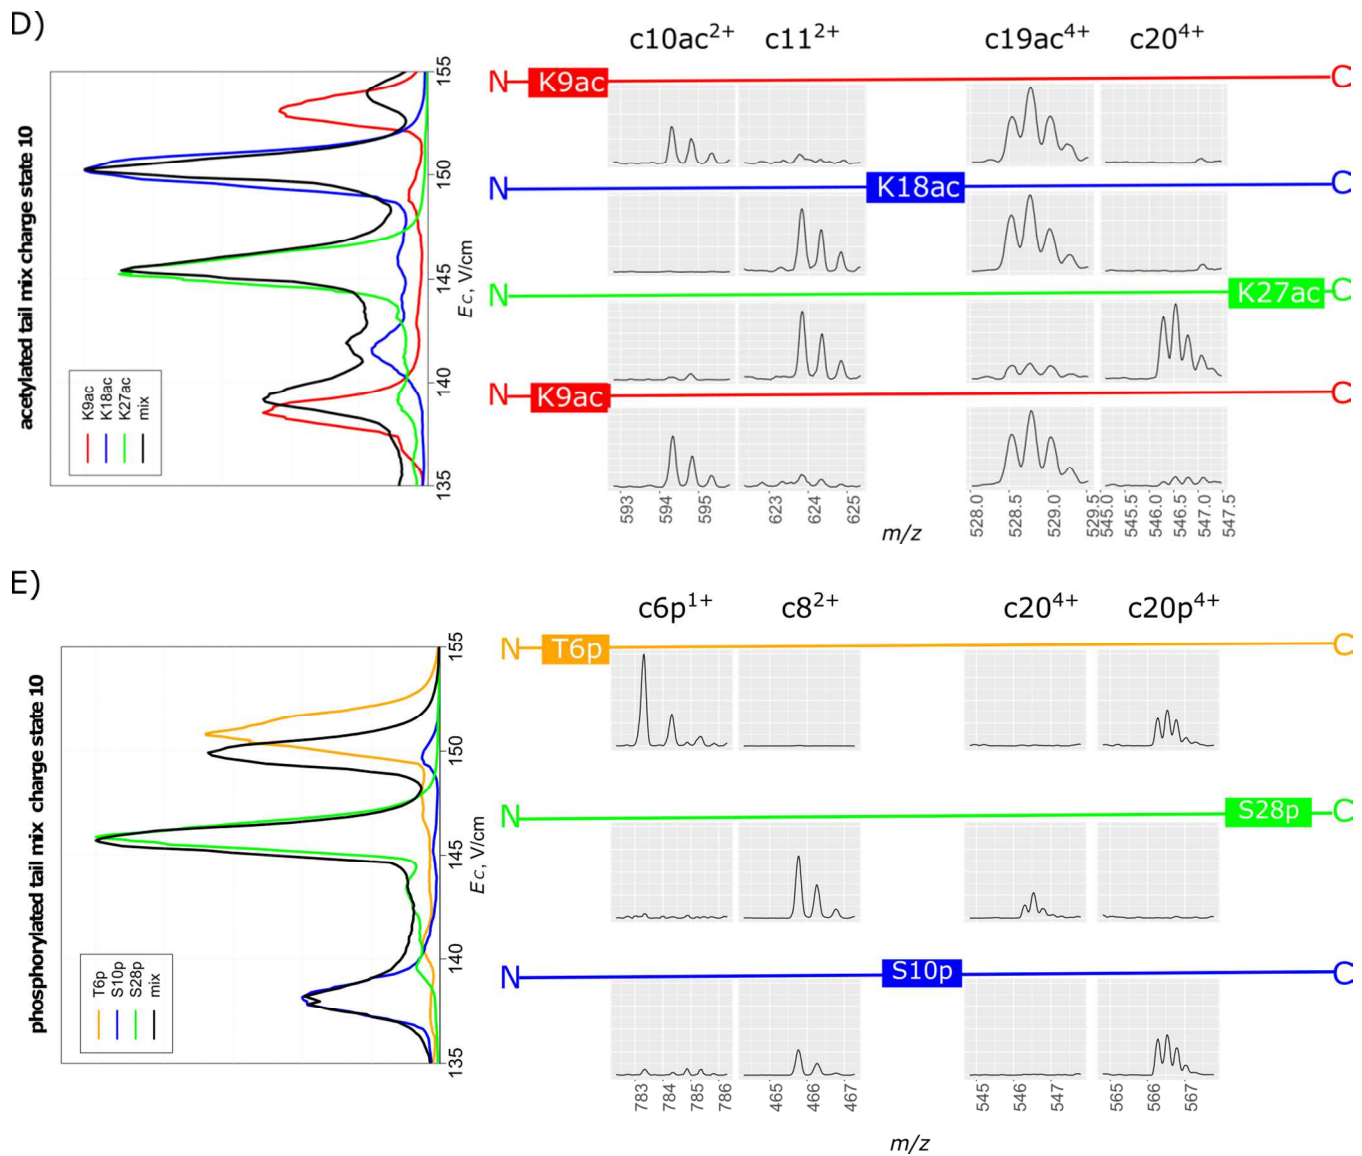

Fig. S6. Validation of FAIMS separation of representative binary and ternary variant mixtures by ETD MS/MS (zoom mode):

- A. K4me1/K9me1/K23me1
- B. K4me3/K27me3
- C. K9ac/K14ac/K36ac
- D. K9ac/K18ac/K27ac
- E. T6p/S10p/S28P

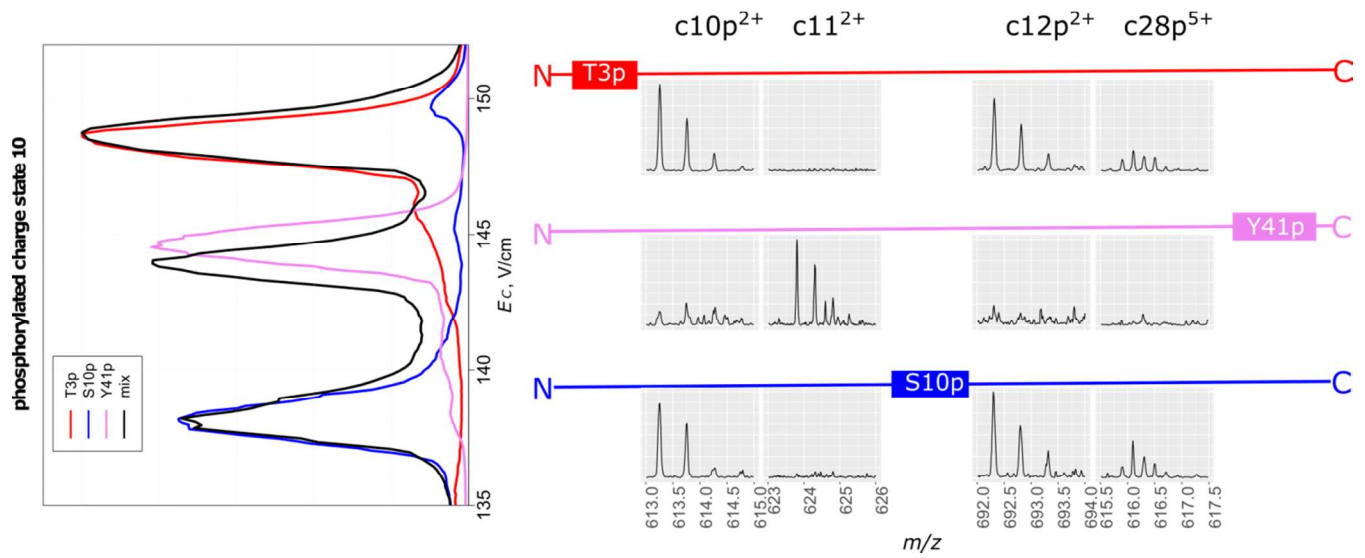

Fig. S7. Validation of FAIMS separation for the T3p/S10p/Y41p variant mixture by ETD MS/MS in the ultrazoom mode.

**Table S1.** Values of EC (V/cm) for tallest FAIMS spectral peaks: all variants and charge states.

|        | z = 8 | z = 9 | z =10 | z = 11 | z = 12 |
|--------|-------|-------|-------|--------|--------|
| K4me3  | 128.5 | 124.9 | 135.4 | 140    | 132.6  |
| K9me3  | 122.8 | 134.5 | 146.8 | 139.6  | 131.3  |
| K23me3 | 141.2 | 133   | 144.7 | 132.2  | 131.3  |
| K27me3 | 131.6 | 136.9 | 146   | 129.8  | 132.7  |
| K36me3 | 144.5 | 155.6 | 137   | 125    | 124.9  |
| K9ac   | 137.7 | 137.7 | 138.5 | 138.8  | 134.3  |
| K14ac  | 139.3 | 152.2 | 145.9 | 133.8  | 131.8  |
| K18ac  | 140.4 | 151.2 | 150.2 | 141.1  | 142.8  |
| K27ac  | 138.1 | 138.6 | 145.2 | 140.4  | 141    |
| K36ac  | 130.2 | 139.4 | 149.3 | 141.3  | 131.5  |
| T3p    | 131.4 | 132.7 | 148.7 | 135.1  | 146.4  |
| T6p    | 139.2 | 136.3 | 150.8 | 144.1  | 144.7  |
| S10p   | 124   | 137.1 | 138.2 | 140.2  | 145.1  |
| S28p   | 130.7 | 137.1 | 145.9 | 142.4  | 144.3  |
| Y41p   | 128.6 | 133.1 | 144.5 | 140.3  | 132.3  |
|        | z = 8 | z = 9 | z =10 | z = 11 | z = 12 |
| K4me3  | 128.5 | 124.9 | 135.4 | 140    | 132.6  |

**Table S2.** Statistics of correlations between separations in all charge state pairs for trimethylated, acetylated, and phosphorylated variants.

| Charge state pair | PTM | Correlation coefficient (R) | R2   | Correlation p-value | Adjusted p-value |
|-------------------|-----|-----------------------------|------|---------------------|------------------|
| 8, 9              | me3 | 0.64                        | 0.41 | 0.24                | 0.91             |
| 8, 10             | me3 | -0.31                       | 0.10 | 0.61                | 0.93             |
| 8, 11             | me3 | -0.84                       | 0.70 | 0.08                | 0.59             |
| 8, 12             | me3 | -0.68                       | 0.46 | 0.21                | 0.90             |
| 9, 10             | me3 | -0.15                       | 0.02 | 0.81                | 0.93             |
| 9, 11             | me3 | -0.84                       | 0.71 | 0.07                | 0.59             |
| 9, 12             | me3 | -0.92                       | 0.85 | 0.03                | 0.40             |
| 10, 11            | me3 | 0.08                        | 0.01 | 0.90                | 0.93             |
| 10, 12            | me3 | 0.42                        | 0.18 | 0.48                | 0.92             |
| 11, 12            | me3 | 0.68                        | 0.47 | 0.21                | 0.90             |
| 8, 9              | ac  | 0.55                        | 0.31 | 0.33                | 0.92             |
| 8, 10             | ac  | -0.20                       | 0.04 | 0.75                | 0.93             |
| 8, 11             | ac  | -0.39                       | 0.15 | 0.52                | 0.92             |
| 8, 12             | ac  | 0.57                        | 0.32 | 0.32                | 0.92             |
| 9, 10             | ac  | 0.49                        | 0.24 | 0.40                | 0.92             |
| 9, 11             | ac  | -0.50                       | 0.25 | 0.40                | 0.92             |
| 9, 12             | ac  | 0.13                        | 0.02 | 0.84                | 0.93             |
| 10, 11            | ac  | 0.31                        | 0.09 | 0.62                | 0.93             |
| 10, 12            | ac  | 0.24                        | 0.06 | 0.69                | 0.93             |
| 11, 12            | ac  | 0.50                        | 0.25 | 0.39                | 0.92             |
| 8, 9              | p   | -0.02                       | 0.00 | 0.98                | 0.98             |
| 8, 10             | p   | 0.93                        | 0.86 | 0.02                | 0.40             |

|        |   |       |      |      |      |
|--------|---|-------|------|------|------|
| 8, 11  | p | 0.39  | 0.15 | 0.51 | 0.92 |
| 8, 12  | p | 0.19  | 0.04 | 0.76 | 0.93 |
| 9, 10  | p | -0.31 | 0.10 | 0.61 | 0.93 |
| 9, 11  | p | 0.70  | 0.49 | 0.19 | 0.90 |
| 9, 12  | p | 0.45  | 0.20 | 0.45 | 0.92 |
| 10, 11 | p | 0.08  | 0.01 | 0.90 | 0.93 |
| 10, 12 | p | 0.14  | 0.02 | 0.82 | 0.93 |
